# Supplementary material for: The Stress Response of the Holothurian Central Nervous System: A Transcriptomic Analysis
Source: MDPI journal article supplement (doi:10.3390/ijms232113393), 2022-11-02
Supplement: s1 [file s1]

# Supplementary Materials

A

```

TRINITY_DN33848      1  -QIFVKTLPGKTTITLEVEPSDTIENVKSNIQDKEGIPPDQORLIFSCKQLEDGRTLVDYN
AAH25894.1           1  MQIFVKTLTGKTTITLEVEPSDTIENVKAKIQDKEGIPPDQORLIFAGKQLEDGRTLSDYN
NP_001284937.1       1  MQIFVKTLTGKTTITLEVEPSDTIENVKAKIQDKEGIPPDQORLIFAGKQLEDGRTLSDYN
PIK46166.1           1  MQIFVKTLTGKTTITLEVEPSDTIENVKSKIQDKEGIPPDQORLIFAGKQLEDGRTLSDYN

TRINITY_DN33848      60  TQKEATLHLVLRRLGGMQIFVKTLPGKTTITLEVEPSDTIENVKSNIQDKEGIPPDQORLI
AAH25894.1           61  IQKESTLHLVLRRLGGMQIFVKTLTGKTTITLEVEPSDTIENVKAKIQDKEGIPPDQORLI
NP_001284937.1       61  IQKESTLHLVLRRLGGMQIFVKTLTGKTTITLEVEPSDTIENVKAKIQDKEGIPPDQORLI
PIK46166.1           61  IQKESTLHLVLRRLGGMQIFVKTLTGKTTITLEVEPSDTIENVKSKIQDKEGIPPDQORLI

TRINITY_DN33848      120  FSGKQLEDGRTLVDYNIQKEATLHLVLRRLGGMQIFVKTLTGKTTITLEVEPSDTIENVKT
AAH25894.1           121  FAGKQLEDGRTLSDYNIQKESTLHLVLRRLGGMQIFVKTLTGKTTITLEVEPSDTIENVKA
NP_001284937.1       121  FAGKQLEDGRTLSDYNIQKESTLHLVLRRLGGMQIFVKTLTGKTTITLEVEPSDTIENVKA
PIK46166.1           121  FAGKQLEDGRTLSDYNIQKESTLHLVLRRLGGMQIFVKTLTGKTTITLEVEPSDTIENVKS

TRINITY_DN33848      180  KNODKQGIP-----
AAH25894.1           181  KIQDKEGIP-----
NP_001284937.1       181  KIQDKEGIPPDQORLI-FAGKQL-----EDGRTLSDYNIQKESTLHLVLRRLRG
PIK46166.1           181  KIQDKEGIPQISSVLSILVSSSRTEGRYPTTTSRKSPHSILSFVSVKKESTLHLVLRRLRG

TRINITY_DN33848      189  -----P-----YQQRKI
AAH25894.1           190  -----P-----DQORLI
NP_001284937.1       228  GMQIFVKTLTGKTTITLEVEPSDTIENVKAKIQDKEGIPP-----DQORLI
PIK46166.1           241  GMQIFVKTLTGKTTITLEVEPSDTIENVKSKIQDKEGIPPDQORLIFAGQGRYSPDQORLI

TRINITY_DN33848      196  FAGFELDDGRTLSDYNIQKESTLHLVLRRLGGMQIFDKTLTGKTTITLEVEPSDTIENVKT
AAH25894.1           197  FAGKQLEDGRTLSDYNIQKESTLHLVLRRLGGMQIFVKTLTGKTTITLEVEPSDTIENVKA
NP_001284937.1       273  FAGKQLEDGRTLSDYNIQKESTLHLVLRRLGGMQIFVKTLTGKTTITLEVEPSDTIENVKA
PIK46166.1           301  FAGKQLEDGRTLSDYNIQKESTLHLVLRRLGGMQIFVKTLTGKTTITLEVEPSDTIENVKS

TRINITY_DN33848      256  K-----
AAH25894.1           257  K-----
NP_001284937.1       333  KIQDKEGIPPDQORLIFAGKQLEDGRTLSDYNIQKESTLHLVLRRLGGMQIFVKTLTGKT
PIK46166.1           361  KIQDKEGIPPDQORLIFADL-----CQNSDWQD

TRINITY_DN33848      257  -----NODKQGIPFYQQRKIFAGFELDDGRTLSDYNIQKESTLHLVLR
AAH25894.1           258  -----IQDKEGIPPDQORLIFAGKQLEDGRTLSDYNIQKESTLHLVLR
NP_001284937.1       393  TLEVEPSDTIENVKAKIQDKEGIPPDQORLIFAGKQLEDGRTLSDYNIQKESTLHLVLR
PIK46166.1           389  HTLEVEPSDTIENVKSKIQDKEGIPPDQORLIFAGKQLEDGRTLSDYNIQKESTLHLVLR

TRINITY_DN33848      300  LRGGMQIFDKTLTGKT-----
AAH25894.1           301  LRGGMQIFVKTLTGKTTITLEVEPSVTTKKVKQEDRRTFLTTSVSKSPACACSW-----
NP_001284937.1       453  LRGGMQIFVKTLTGKTTITLEVEPSDTIENVKAKIQ-----DKEGIPPDQORLIFAGKQL
PIK46166.1           449  LRGGMQIFVKTLTGKTTITLEVEPSDTIENVNPKSG-----QGRYSFDHSVSSILVNN--

TRINITY_DN33848      -----
AAH25894.1           354  -----V
NP_001284937.1       507  EDGRTLSDYNIQKESTLHLVLRRLGGAI-----
PIK46166.1           -----

```

## B

|                 |   |                                               |                    |
|-----------------|---|-----------------------------------------------|--------------------|
| TRINITY_DN43805 | 1 | ADGRSLYDFNLPKESTHVVLRIRGCMQIFVNTLTGKTITLEVETS | SDTIENVKSKIQDKE    |
| AAA28997.1      | 1 | MQIFVKTLTGKTITLEVEPSDTIENVKAKIQDKEGIPPDQQR    | LIFAGKQLEDGRTLSDYN |
| AAH08661.1      | 1 | MQIFVKTLTGKTITLEVEPSDTIENVKAKIQDKEGIPPDQQR    | LIFAGKQLEDGRTLSDYN |
| PIK45544.1      | 1 | MQIFVKTLTGKTITLEVEPSDTIENVKSKIQDKEGIPPDQQR    | LIFAGKQLEDGRTLSDYN |

|                 |    |                                                            |                    |
|-----------------|----|------------------------------------------------------------|--------------------|
| TRINITY_DN43805 | 61 | GIPPDQQRLLIFPGKQLEDGRTQYQTNIHNETTRQ-PNRYTE                 | -----              |
| AAA28997.1      | 61 | IQESTLHLVLRRLRGGMQIFVKTLTGKTITLEVEPSDTIENVKAKIQDKEGIPPDQQR | LIFAGKQLEDGRTLSDYN |
| AAH08661.1      | 61 | IQESTLHLVLRRLRGGMQIFVKTLTGKTITLEVEPSDTIENVKAKIQDKEGIPPDQQR | LIFAGKQLEDGRTLSDYN |
| PIK45544.1      | 61 | IQESTLHLVLRRLRGGMQIFVKTLTGKTITLEVEPSDTIENVKSKIQDKEGIPPDQQR | LIFAGKQLEDGRTLSDYN |

|                 |     |                                                                            |                    |
|-----------------|-----|----------------------------------------------------------------------------|--------------------|
| TRINITY_DN43805 | 121 | FAGKQLEDGRTLSDYNIQESTLHLVLRRLRGGMQIFVKTLTGKTITLEVEPSDTIENVKAKIQDKEGIPPDQQR | LIFAGKQLEDGRTLSDYN |
| AAA28997.1      | 121 | FAGKQLEDGRTLSDYNIQESTLHLVLRRLRGGMQIFVKTLTGKTITLEVEPSDTIENVKAKIQDKEGIPPDQQR | LIFAGKQLEDGRTLSDYN |
| AAH08661.1      | 121 | FAGKQLEDGRTLSDYNIQESTLHLVLRRLRGGMQIFVKTLTGKTITLEVEPSDTIENVKAKIQDKEGIPPDQQR | LIFAGKQLEDGRTLSDYN |
| PIK45544.1      | 121 | FAGKQLEDGRTLSDYNIQESTLHLVLRRLRGGMQIFVKTLTGKTITLEVEPSDTIENVKAKIQDKEGIPPDQQR | LIFAGKQLEDGRTLSDYN |

|                 |     |                                                      |       |
|-----------------|-----|------------------------------------------------------|-------|
| TRINITY_DN43805 | 181 | KIQDKEGIPPDQQRLLIFAGKQLEDGRTLSDYNIQESTLHLVLRRLRGGIQA | ----- |
| AAA28997.1      | 181 | EDRRTFLTTVSKKSPPCACSWV                               | ----- |
| AAH08661.1      | 181 | KIQDKEGIPPDQQRLLIFAGKQLEDGRTLSDYNIQESTLHLVLRRLRGGIQA | ----- |
| PIK45544.1      | 181 | KIQDKEGIPPDQQRLLIFAGKQLEDGRTLSDYNIQESTLHLVLRRLRGGIQA | ----- |

## C

|                 |   |                                                                |
|-----------------|---|----------------------------------------------------------------|
| TRINITY_DN16432 | 1 | ----VKTTLTGKTITLDVEPSDTIENVKSKIQDKEGIPPDQQRSLIFAGKQLEDGRTLSDYN |
| BAB22630.1      | 1 | MQIFVKTLTGKTITLEVEPSDTIENVKAKIQDKEGIPPDQQRLLIFAGKQLEDGRTLSDYN  |
| AAA28997.1      | 1 | MQIFVKTLTGKTITLEVEPSDTIENVKAKIQDKEGIPPDQQRLLIFAGKQLEDGRTLSDYN  |
| PIK45544.1      | 1 | MQIFVKTLTGKTITLEVEPSDTIENVKSKIQDKEGIPPDQQRLLIFAGKQLEDGRTLSDYN  |

|                 |    |                                                                               |
|-----------------|----|-------------------------------------------------------------------------------|
| TRINITY_DN16432 | 57 | IQESTLHLVLRRLRGGMQIFVKTLTGKTITLDVEPSDTIENVKSKIQDKEGIPPDQQRSLIFAGKQLEDGRTLSDYN |
| BAB22630.1      | 61 | IQESTLHLVLRRLRGGMQIFVKTLTGKTITLEVEPSDTIENVKAKIQDKEGIPPDQQRLLIFAGKQLEDGRTLSDYN |
| AAA28997.1      | 61 | IQESTLHLVLRRLRGGMQIFVKTLTGKTITLEVEPSDTIENVKAKIQDKEGIPPDQQRLLIFAGKQLEDGRTLSDYN |
| PIK45544.1      | 61 | IQESTLHLVLRRLRGGMQIFVKTLTGKTITLEVEPSDTIENVKSKIQDKEGIPPDQQRLLIFAGKQLEDGRTLSDYN |

|                 |     |                                                                                               |
|-----------------|-----|-----------------------------------------------------------------------------------------------|
| TRINITY_DN16432 | 117 | FAGKQLEDGRTLSDYNIQESTLHLVLRRLRGGMQIFVKTLTGKTITLDVEPSDTIENVKAKIQDKEGIPPDQQRLLIFAGKQLEDGRTLSDYN |
| BAB22630.1      | 121 | FAGKQLEDGRTLSDYNIQESTLHLVLRRLRGGMQIFVKTLTGKTITLEVEPSDTIENVKAKIQDKEGIPPDQQRLLIFAGKQLEDGRTLSDYN |
| AAA28997.1      | 121 | FAGKQLEDGRTLSDYNIQESTLHLVLRRLRGGMQIFVKTLTGKTITLEVEPSDTIENVKAKIQDKEGIPPDQQRLLIFAGKQLEDGRTLSDYN |
| PIK45544.1      | 121 | FAGKQLEDGRTLSDYNIQESTLHLVLRRLRGGMQIFVKTLTGKTITLEVEPSDTIENVKAKIQDKEGIPPDQQRLLIFAGKQLEDGRTLSDYN |

|                 |     |                                                      |
|-----------------|-----|------------------------------------------------------|
| TRINITY_DN16432 | 177 | KNQD-----                                            |
| BAB22630.1      | 181 | KIQDKEGIPPDQQRLLIFAGKQLEDGRTLSDYNIQESTLHLVLRRLRGGY-- |
| AAA28997.1      | 181 | KIQDKEGIPPDQQRLLIFAGKQLEDGRTLSDYNIQESTLHLVLRRLRGGIQA |
| PIK45544.1      | 181 | KIQDKEGIPPDQQRLLIFAGKQLEDGRTLSDYNIQESTLHLVLRRLRGGIQA |

# D

|                 |     |                                  |                                                  |                                  |                  |
|-----------------|-----|----------------------------------|--------------------------------------------------|----------------------------------|------------------|
| TRINITY_DN52789 | 1   | MIQKES                           | TLHLVLRRLRGGMQFFVKTLTGKT                         | ITLEVEPSDTIENLKY                 | KIQDKKGIPQDQNR   |
| AAH19850.1      | 1   | MQIFVKTLTGKT                     | ITLEVEPSDTIENVKAKIQDKEGIPPDQORLIFAGKQLEDGRTLSDYN |                                  |                  |
| NP_001284937.1  | 1   | MQIFVKTLTGKT                     | ITLEVEPSDTIENVKAKIQDKEGIPPDQORLIFAGKQLEDGRTLSDYN |                                  |                  |
| PIK45544.1      | 1   | MQIFVKTLTGKT                     | ITLEVEPSDTIENVKSKIQDKEGIPPDQORLIFAGKQLEDGRTLSDYN |                                  |                  |
| TRINITY_DN52789 | 61  | IFDGKQLEDGRTL                    | SVYMIQKES                                        | TLHLVLRRLRGGMQFFVKTLTGKT         | ITLEVEPSDTIENLKY |
| AAH19850.1      | 61  | IQKES                            | TLHLVLRRLRGGMQIFVKTLTGKT                         | ITLEVEPSDTIENVKAKIQDKEGIPPDQORLI |                  |
| NP_001284937.1  | 61  | IQKES                            | TLHLVLRRLRGGMQIFVKTLTGKT                         | ITLEVEPSDTIENVKAKIQDKEGIPPDQORLI |                  |
| PIK45544.1      | 61  | IQKES                            | TLHLVLRRLRGGMQIFVKTLTGKT                         | ITLEVEPSDTIENVKSKIQDKEGIPPDQORLI |                  |
| TRINITY_DN52789 | 121 | YKIQDKKGIPQDQNR                  | LI                                               | FDGKQLEDGRTLSDYNIQY              | DSL              |
| AAH19850.1      | 121 | FAGKQLEDGRTLSDYNIQKES            | TLHLVLRRLRGGMQIFVKTLTGKT                         | ITLEVEPSDTIENVKA                 |                  |
| NP_001284937.1  | 121 | FAGKQLEDGRTLSDYNIQKES            | TLHLVLRRLRGGMQIFVKTLTGKT                         | ITLEVEPSDTIENVKA                 |                  |
| PIK45544.1      | 121 | FAGKQLEDGRTLSDYNIQKES            | TLHLVLRRLRGGMQIFVKTLTGKT                         | ITLEVEPSDTIENVKS                 |                  |
| TRINITY_DN52789 |     |                                  |                                                  |                                  |                  |
| AAH19850.1      | 181 | KIQDKEGIPPDQORLI                 | FAGKQLEDGRTLSDYNIQKES                            | TLHLVLRRLRGGMQIFVKTLTGKT         |                  |
| NP_001284937.1  | 181 | KIQDKEGIPPDQORLI                 | FAGKQLEDGRTLSDYNIQKES                            | TLHLVLRRLRGGMQIFVKTLTGKT         |                  |
| PIK45544.1      | 181 | KIQDKEGIP                        | QTSSVSSSLVN                                      |                                  |                  |
| TRINITY_DN52789 |     |                                  |                                                  |                                  |                  |
| AAH19850.1      | 241 | ITLEVEPSDTIENVKAKIQDKEGIPPDQORLI | FAGKQLEDGRTLSDYNIQKES                            | TLHLVLR                          |                  |
| NP_001284937.1  | 241 | ITLEVEPSDTIENVKAKIQDKEGIPPDQORLI | FAGKQLEDGRTLSDYNIQKES                            | TLHLVLR                          |                  |
| PIK45544.1      |     |                                  |                                                  |                                  |                  |
| TRINITY_DN52789 |     |                                  |                                                  |                                  |                  |
| AAH19850.1      | 301 | LRGGY                            |                                                  |                                  |                  |
| NP_001284937.1  | 301 | LRGGMQIFVKTLTGKT                 | ITLEVEPSDTIENVKAKIQDKEGIPPDQORLIFAGKQLEDGRTL     |                                  |                  |
| PIK45544.1      |     |                                  |                                                  |                                  |                  |
| TRINITY_DN52789 |     |                                  |                                                  |                                  |                  |
| AAH19850.1      |     |                                  |                                                  |                                  |                  |
| NP_001284937.1  | 361 | SDYNIQKES                        | TLHLVLRRLRGGMQIFVKTLTGKT                         | ITLEVEPSDTIENVKAKIQDKEGIPPDQ     |                  |
| PIK45544.1      |     |                                  |                                                  |                                  |                  |
| TRINITY_DN52789 |     |                                  |                                                  |                                  |                  |
| AAH19850.1      |     |                                  |                                                  |                                  |                  |
| NP_001284937.1  | 421 | QRLIFAGKQLEDGRTLSDYNIQKES        | TLHLVLRRLRGGMQIFVKTLTGKT                         | ITLEVEPSDTIE                     |                  |
| PIK45544.1      |     |                                  |                                                  |                                  |                  |
| TRINITY_DN52789 |     |                                  |                                                  |                                  |                  |
| AAH19850.1      |     |                                  |                                                  |                                  |                  |
| NP_001284937.1  | 481 | NVKAKIQDKEGIPPDQORLI             | FAGKQLEDGRTLSDYNIQKES                            | TLHLVLRRLRGGA                    |                  |
| PIK45544.1      |     |                                  |                                                  |                                  |                  |

Figure S1: (A-D) Alignment of each of the four ubiquitin *H. glaberrima* transcripts with their respective closest matches from the NCBI non-redundant database.
